# Supplementary material for: High acceptability of a newly developed urological practical skills training program
Source: Springer Nature journal article supplement (doi:10.1186/s12894-015-0084-8), 2015-09-03
Supplement: MOESM1 [file 9753618]

## Additional file 1. Questionnaire

### DEMOGRAPHICS

*All data will be processed anonymously!*

1. Name
2. Teaching hospital
3. Year of residency training (for residents)

### CURRENT RESIDENCY TRAINING PROGRAM

4. Is non-patient related practical skills training (diagnostic and operative skills) a structured part of residency training in your teaching hospital?

- Yes  
 No

If Yes:

5. Who provides / supervises this structured local non-patient related practical skills training? (Multiple answer options possible)

- Program director  
 Staff urologist  
 Resident  
 External people

5. Which practical skills are trained and what is the frequency of this practical skills training?

---

### D-UPS PROGRAM

6. Implementation of the D-UPS program would be a useful addition to present residency training

- Agree  
 Partially agree  
 Neutral / don't know  
 Partially disagree  
 Disagree

7. Expected positive effects of the implementation of the D-UPS program would be:

|                                                  | Agree | Partially agree | Neutral / don't know | Partially disagree | Disagree |
|--------------------------------------------------|-------|-----------------|----------------------|--------------------|----------|
| Patient safety*                                  |       |                 |                      |                    |          |
| More efficient time usage in the operating room* |       |                 |                      |                    |          |
| Increase in self-confidence of residents         |       |                 |                      |                    |          |
| Uniformity of actions of residents               |       |                 |                      |                    |          |

Others and / or explanation

---

\* Definition of endpoints:

- Patient safety: the prevention of errors and adverse effects to patients associated with health care
- More efficient time usage in the operating room: shorter procedural time due to a shortened patient related learning curve

8. Expected difficulties in the implementation of the D-UPS program would be:

|                                                                                            | Agree | Partially agree | Neutral / don't know | Partially disagree | Disagree |
|--------------------------------------------------------------------------------------------|-------|-----------------|----------------------|--------------------|----------|
| Motivation of program directors in participation and organization of the training sessions |       |                 |                      |                    |          |
| Motivation of residents in participation and organization of the training sessions         |       |                 |                      |                    |          |
| Logistics of one hour of training per week                                                 |       |                 |                      |                    |          |
| Availability of simulation models and materials                                            |       |                 |                      |                    |          |

Others and / or explanation

---

9. Procedures that should definitely be incorporated in the D-UPS program:

---

***Thank you very much for your time and participation!!***

Place for remarks / general comments

---

---
