# Supplementary material for: High acceptability of a newly developed urological practical skills training program
Source: Springer Nature journal article supplement (doi:10.1186/s12894-015-0084-8), 2015-09-03

# BASIC LAPAROSCOPY

## Procedural steps

1. Check materials
2. Positioning patient
3. Trocar insertion
4. 3-dimensional orientation and movement
5. Usage of the camera
6. Cutting
7. Grasping
8. Tissue dissection
9. Applying appropriate traction to tissue
10. Smooth clipping
11. Solve bleedings
12. Suturing, handling needle driver

## Simulator

Box trainer

## Pitfalls technical skills

Counter-intuitive movement/fulcrum effect  
Eye-hand coordination  
Anatomical orientating  
Image interpretation (2D-3D)  
Tissue handling  
Lack of experience in open procedure or anatomy  
Orientation of position of patient with regards to position of instruments

## Pitfalls non-technical skills

Lack of knowledge of materials  
Insufficient preparation  
Trouble shooting in material or equipment errors  
Progress of procedure in case of difficulties in orientation  
Teamwork operator/assistance  
Risk assessment in decision to convert to open  
Knowledge of anatomy (difference open and laparoscopic procedure)

## Task 1: Peg Transfer

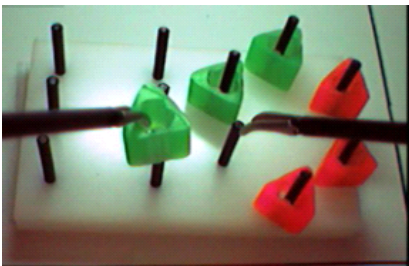

## Task 2: Cutting a Circle

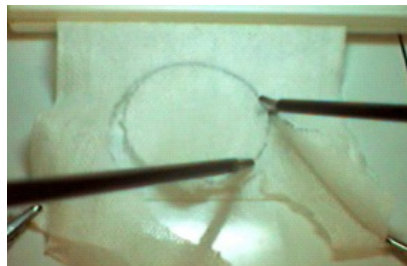

## Task 3: Single knot tying

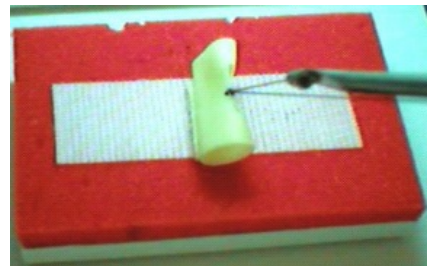

## Task 4: Clip & Cut

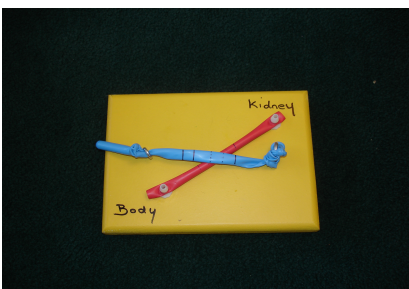

## Task 5: Needle guidance

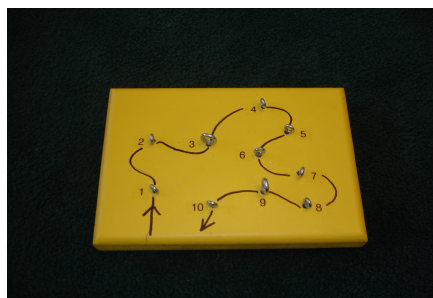

Supplement: MOESM3 [file 9753618]
